# Supplementary material
Source: PubMed Central journal article supplement (PMC4409829)
Supplement: NIHMS134883-supplement-Supplementary_Data.pdf [file NIHMS134883-supplement-Supplementary_Data.pdf]

Supplemental Table 1. Oligonucleotides used in this study.

| Oligonucleotide                    | Sequence (5'-3')                                     |
|------------------------------------|------------------------------------------------------|
| <b><i>psl</i> single deletions</b> |                                                      |
| <i>pslAEcoR</i>                    | GATGAATTTCGAACCTCTTCCGCCTTCG                         |
| <i>pslAOLF</i>                     | CAGAGCAAACAACATGCATTTCGAAGCTGACCAAGGAAGTCTACTGATGAAC |
| <i>pslAOLR</i>                     | G TTCATCAGTAGACTTCCTTGGTCAGCTTCGAATGCATGTTGTTTGCTCTG |
| <i>pslAHind</i>                    | GATAAGCTTCCTGTTTCGATATAGCCG                          |
| <i>pslBEcoR</i>                    | GACGAATTCGATCAGGCTCGACTCCAA                          |
| <i>pslBOLF</i>                     | GACCAAGGAAGTCTACTGATGAACGACGAGAAGAAAGCCTGATGCGCTG    |
| <i>pslBOLR</i>                     | CAGCGCATCAGGCTTTCTTCTCGTCGTTTCATCAGTAGACTTCCTTGGTC   |
| <i>pslBHind</i>                    | CATAAGCTTGAGAACGAGTCGGAACT                           |
| <i>pslCEcoR</i>                    | CTAGAATTCGTGCACGACCTGATCATCG                         |
| <i>pslCOLF</i>                     | GACGAGAAGAAAGCCTGATGCGCTGCTGAACATCATGACCTACAGGAAGTG  |
| <i>pslCOLR</i>                     | CACTTCCTGTAGGTCATGATGTTTCAGCAGCGCATCAGGCTTTCTTCTCGTC |
| <i>pslCHind</i>                    | GATAAGCTTGAGGATCGCCTGCTCCATG                         |
| <i>pslDEcoR</i>                    | CAGGAATTCCAGCAAGCGCCTGGCCGAC                         |
| <i>pslDOLF</i>                     | CAGGAAGTGCTCCCTCATGAAACGCTGAGGAGCGACATCGCCATGATAG    |
| <i>pslDOLR</i>                     | CTATCATGGCGATGTCGCTCCTCAGCGTTTCATGAGGGAGCACTTCCTG    |
| <i>pslDHind</i>                    | CATAAGCTTGATCTCCATCACCGTCGAG                         |
| <i>pslEEcoR</i>                    | GTCGAATTCCATCTACTATCCGTTTCATC                        |
| <i>pslEOLF</i>                     | CTGAGGAGCGACATCGCCATGATATAACGGAGCGCGTTTCTGATGC       |
| <i>pslEOLR</i>                     | GCATCAGAACGCGCTCCGGTATATCATGGCGATGTCGCTCCTCAG        |
| <i>pslEHind</i>                    | ATCAAGCTTGCCGTGGTTGATCACCTC                          |
| <i>pslFEcoR</i>                    | CTGGAATTCCTCGACCAGCGCATCCAC                          |
| <i>pslFOLF</i>                     | GCTACCGGAGCGCGTTTCTGATGCATGGCACGTAAGGGACTCTATCTG     |
| <i>pslFOLR</i>                     | CAGATAGAGTCCCTTACGTGCCATGCATCAGAACGCGCTCCGGTAGC      |
| <i>pslFHind</i>                    | ATCAAGCTTCAGAAGCCGATCAGGTTGG                         |
| <i>pslGEcoR</i>                    | CATGAATTCCAAAGGCATCGAGGACCTG                         |
| <i>pslGOLF</i>                     | CATGGCACGTAAGGGACTCTATCTGTGAAGCCACCCATGCGTATTCTC     |
| <i>pslGOLR</i>                     | GAGAATACGCATGGGTGGCTTACAGATAGAGTCCCTTACGTGCCATG      |
| <i>pslGHind</i>                    | ATCAAGCTTCACTGGTCGTAGCGCACG                          |
| <i>pslJEcoR</i>                    | CTGGAATTCGACGAGGCTGTGCGGCTG                          |
| <i>pslJOLF</i>                     | GAGAATGTCGTTGGGAAACCTCGTCTTCTGGCTGCTGGTTCGGGATCAAC   |
| <i>pslJOLR</i>                     | GTTGATCCCGACCAGCAGCCAGAAGACGAGGTTTCCCAACGACATTCTC    |
| <i>pslJHind</i>                    | GTAAAGCTTGTAGATTGAACAGCAGCGAG                        |

|                                                    |                                                    |
|----------------------------------------------------|----------------------------------------------------|
| <i>pslKEcoR</i>                                    | GTGGAATTCGTGCGTTTCGACGAATACC                       |
| <i>pslKOLF</i>                                     | CTGACCCTTGCCACCCTGCTCCTTCGAACAACCACTGTGAGTTAG      |
| <i>pslKOLR</i>                                     | CTAACTCACAGTGGTTGTTTGAAGGAGCAGGGTGGCAAGGGTCAG      |
| <i>pslKHind</i>                                    | CACAAGCTTCAGCAGCACGCAACTG                          |
| <i>pslLEcoR</i>                                    | GTGGAATTCCTGGTGGCCCTGTTGCTG                        |
| <i>pslLOLF</i>                                     | GAGTTGCAAAGTGAAAAACGCTTCCCGGTGCGCAAGAAGACC         |
| <i>pslLOLR</i>                                     | GGTCTTCTTGCGCACCGGGAAGCGTTTTTTTCACTTTGCAACTC       |
| <i>pslLHind</i>                                    | CCCAAGCTTGAAGAAGGCCACCATGTG                        |
| <i>pslMEcoR</i>                                    | GTGGAATTCCTGGTGGCCCTGTTGCTG                        |
| <i>pslMOLF</i>                                     | CTTGAAAAAGGGAGAAGCCATGACCTGAACGTTCCAGCGGGCGCAGCGGC |
| <i>pslMOLR</i>                                     | GCCGCTGCGCCCGCTGGAACGTTCAAGGTCATGGCTTCTCCCTTTTCAAG |
| <i>pslMBamH</i>                                    | CTCGGATCCCAGGGCCACCACCTTGTC                        |
| <i>pslNEcoR</i>                                    | CAGGAATTCAGCGGCTATCTCAAGCG                         |
| <i>pslNOLF</i>                                     | CTTCGGAACCCAAGCATGAGCGCACTCGACACGCCCGGCTGATCAGTTG  |
| <i>pslNOLR</i>                                     | CAACTGATCAGCCGGGCGTGTCGAGTGCCTCATGCTTGGGTCCGAAG    |
| <i>pslNBamH</i>                                    | CTGGGATCCGATGCGGACTACATGCTG                        |
| <i>pslOEcoR</i>                                    | CAAGAATTCCTTCAAGGGCAAGAGCGGC                       |
| <i>pslOOLF</i>                                     | CTCGACACGCCCGGCTGATCAGTTGGTAACGTTACGCAGATAGACAGG   |
| <i>pslOOLR</i>                                     | CCTGTCTATCTGCGTAACGTTACCAACTGATCAGCCGGGCGTGTCGAG   |
| <i>pslOHind</i>                                    | CACAAGCTTGAGAAACAACGCACCATG                        |
| <i>wbpWEcoR</i>                                    | CCGGAATTC AAGCTCTATGGCCACTG                        |
| <i>wbpWOLF</i>                                     | CGTTTCCCGGGAGTAAGCCATGCTGGTCTGATGCTTCTTGGCTTGTCTCG |
| <i>wbpWOLR</i>                                     | CGAGACAAGCCAAGAAGCATCAGACCAGCATGGCTTACTCCCGGGAAACG |
| <i>wbpWHind</i>                                    | CCCAAGCTTGAAGAACACGTTGAGCAC                        |
| <b><i>psl</i> single deletion complementations</b> |                                                    |
| <i>pslACEF</i>                                     | CCGGAATTCGATCGGCAGAGCAAACAAC                       |
| <i>pslACHR</i>                                     | CCCAAGTTCGGGGCGACGGCGTTCA                          |
| <i>pslCCEF</i>                                     | CCGGAATTCGACGAGAAGAAAGCCTG                         |
| <i>pslCCHR</i>                                     | CCCAAGCTTCTTCTGTAGGTCATGATGT                       |
| <i>pslDCEF</i>                                     | CCGGAATTCCTACAGGAAGTGCTCCCTC                       |
| <i>pslDCHR</i>                                     | CCCAAGCTTCATGGCGATGTCGCTCC                         |
| <i>pslECEF</i>                                     | CCGGAATTCCTGAGGAGCGACATCGCC                        |
| <i>pslECHR</i>                                     | CCCAAGCTTCGAGGAGGGCGATCCGCA                        |
| <i>pslFCEF</i>                                     | CCGGAATTCCTACCGGAGCGCGTTCTG                        |
| <i>pslFCHR</i>                                     | CCCAAGCTTCCGCCAGATAGAGTCCC                         |

|                 |                                |
|-----------------|--------------------------------|
| <i>pslG</i> CEF | CCGGAATTCACATGGTGGGAACCGTTC    |
| <i>pslG</i> CHR | CCCAAGCTTGAATACGCATGGGTGGCT    |
| <i>pslJ</i> CEF | CCGGAATTCCGAGGAACTGAGTTGAGA    |
| <i>pslJ</i> CHR | CCCAAGCTTAAGGCGGAGCCGAGCATC    |
| <i>pslK</i> CEF | CCGGAATTCGCGGGGCCGAGGCCTGAG    |
| <i>pslK</i> CHR | CCCAAGCTTCCTACCCGGAGCCATGGG    |
| <i>pslL</i> CEF | CCGGAATTCCGCGTCAAGCGGGAGTTGCAA |
| <i>pslL</i> CHR | CCCAAGCTTGCACCGGGCCGAGGGCG     |

Supplemental Table 2. Plasmids used in construction of single *psl* deletion mutants.

| <b><i>psl</i> deletion plasmids</b> | <b>Phenotype</b>              | <b>Source</b>           |
|-------------------------------------|-------------------------------|-------------------------|
| pHL120                              | <i>pslA</i> in-frame deletion | This work               |
| pHL122                              | <i>pslB</i> in-frame deletion | This work               |
| pHL124                              | <i>pslC</i> in-frame deletion | This work               |
| pHL126                              | <i>pslD</i> in-frame deletion | This work               |
| pHL128                              | <i>pslE</i> in-frame deletion | This work               |
| pHL130                              | <i>pslF</i> in-frame deletion | This work               |
| pHL132                              | <i>pslG</i> in-frame deletion | This work               |
| pMA10                               | <i>pslH</i> in-frame deletion | Ma <i>et al.</i> (2007) |
| pMA11                               | <i>pslI</i> in-frame deletion | Ma <i>et al.</i> (2007) |
| pHL138                              | <i>pslJ</i> in-frame deletion | This work               |
| pHL140                              | <i>pslK</i> in-frame deletion | This work               |
| pHL142                              | <i>pslL</i> in-frame deletion | This work               |
| pHL144                              | <i>pslM</i> in-frame deletion | This work               |
| pHL146                              | <i>pslN</i> in-frame deletion | This work               |
| pHL147                              | <i>pslO</i> in-frame deletion | This work               |
